# Supplementary material for: A longitudinal study of the impact of COVID-19 restrictions on students’ health behavior, mental health and emotional well-being
Source: PeerJ journal article supplement (doi:10.7717/peerj.12528), 2021-12-14
Supplement: Appendix_2_COVID_survey.pdf [file Appendix_2_COVID_survey.pdf]

## Student Health Behavior and Academic Success

Please take your time to read the following information carefully before starting the survey.

### Online Survey Consent Form

**Study Title:** Student Health Behavior and Academic Performance

**Principal Investigator:** Dr. Peter Reuter

You are invited to participate in a research study conducted through Florida Gulf Coast University. You must be age 18 or older to participate in the study. Your participation in this study is voluntary. The University requires that we obtain your consent to participate in this study.

Refusal to join the study will not affect any future services you may be eligible to receive from the University.

### Study Summary

The purpose of this study is to look at how health behavior impacts the academic success of college students. The information we learn from this study will increase overall knowledge and may help design better outreach programs at FGCU and other universities.

Participants in this study will be asked to complete an anonymous online survey. Completing the survey will take less than 20 minutes.

There is a very low risk of a potential invasion of privacy of the participants and/or their families as well as the social risk associated with revealing recreational drug use or prescription drug abuse.

If you are interested in learning more about this study, please continue to read below and contact me ([preuter@fgcu.edu](mailto:preuter@fgcu.edu); 239-590-7512) with any questions you have to help you understand the study.

Your participation in the study is completely voluntary. If you decide to participate now you may change your mind and stop at any time, for any reason, without penalty or loss of any future services you may be eligible to receive from the University.

### Purpose of the Study

The purpose of the study is to look at how health behavior impacts the academic success of college students. There is a limited number of studies that looked at some aspects of student health behavior and a possible correlation to academic success, however, none of them looked at the variety of factors our study will include.

### Invitation to Participate in the Study

We are asking you to take part in the study because you are college student at FGCU and can help us gather data and information for our study.

### Description of your Involvement

If you agree to be part of the research study, you will be asked to complete an anonymous online survey about your health behavior choices, such as eating and drinking habits, sleep, and use of recreational drugs or prescription drugs. We expect the survey will take less than 20 minutes to complete. The survey cannot be completed in more than one session.

### Risks and Discomforts of Participation

The likelihood and seriousness of probing for personal or sensitive information in this survey is minimal. The same applies to a potential invasion of privacy of the participants and/or their families.

We consider the risks to be minimal because the survey is anonymous, participation is optional, and participants have the freedom to control the level of disclosure, i.e., skip questions or not answer any of them. However, participants may consider the risk to be higher than minimal because of questions about personal or sensitive information, such as past suicide attempts.

Your participation will be kept anonymous. However, working with email or the internet has the risk of compromising privacy, confidentiality, and/or anonymity. Despite this possibility, the risks to your physical, emotional, social, professional, or financial well-being are considered to be 'less than minimal' by completing the survey.

We understand that some participants may find it hard to answer certain questions or may get overwhelmed by emotions when describing events from the past.

If you are in immediate distress or crisis and need to speak to a clinician call the CAPS office and ask for an appointment or to speak with a clinician. Nights, weekends, and holidays, you may call the CAPS help line (239) 745-3277 and you will be connected to a clinician.

If you are imminent danger to harm yourself or others, call 911 if you are off campus and 590-1911 if you are on campus, or you may go to the emergency room at the nearest hospital.

You may also contact the National Suicide Prevention Lifeline at 1-800-273-TALK (8255).

### Compensation for Participation

You will not be paid to take part in this study nor will you receive extra credit or any other form of compensation.

### **Confidentiality**

If you join the study, we will make every effort keep your information confidential and secure by taking the following steps:

- The data will be collected anonymously via a Checkbox survey.
- Only the PI has access to the password-protected survey data.
- The data will be downloaded and stored on the PI's personal folder on the FGCU server as recommended by BTS.
- IP address will be stripped off before exporting the data out of Checkbox.

However, despite these safeguards, there is the possibility of hacking or other security breaches that could compromise the confidentiality of the information you provide. Thus, it is important to remember that you are free to decline to answer any question that makes you uncomfortable for any reason.

We will not release information about you unless you authorize us to do so or unless we are required to do so by law. If results of this study are published or presented at a professional meeting, no information will be included that would make it possible to identify you as a study participant.

It is possible that organizations responsible for making sure the research is done safely and properly such as the university, and government offices may need to see the information you provide.

### **Storage and Future Use of Data**

The data will be stored on the PI's personal folder on the FGCU server. They can be destroyed by deleting the folder they are in.

We do not collect any paper records. However, should we print out surveys they will be destroyed using a professional shredding service no sooner than three years after completion of the research.

### **Voluntary Nature of Study**

Participating in this study is completely voluntary. Refusal to join the study will not affect any future services you may be eligible to receive from the University. You can choose to not answer an individual question or you may skip any section of the survey by clicking "Next" at the bottom of the survey page to move to the next section.

If you choose to join the study, you can leave it at any time with no penalty.

### **Contact Information for the Study Team**

We do not foresee any problems from participating in this study. However, if you believe you experienced a research related injury, please contact Dr. Peter Reuter at 239-590-7512 or via email ([preuter@fgcu.edu](mailto:preuter@fgcu.edu)).

If you have any questions about this study, please contact Dr. Peter Reuter at 239-590-7512 or via email ([preuter@fgcu.edu](mailto:preuter@fgcu.edu)).

### **Contact Information for Questions about Your Rights as a Research Participant**

If you have any questions about your rights as a subject/participant in this research, or if you feel you have been placed at risk, you can contact the Chair of the Human Subjects' Institutional Review Board via email ([research@fgcu.edu](mailto:research@fgcu.edu)).

**Statement:** I have read the preceding information describing this study. All of my questions have been answered to my satisfaction. I am 18 years of age or older and freely consent to participate in the study. My decision to participate or to decline participating in this study is completely voluntary. I understand that I am free to withdraw from the study at any time. I am aware of my option to not answer to any questions I choose.

I understand that it is not possible to identify all potential risks I believe that reasonable steps have been taken to minimize both the known and potential but unknown risks. The submission of the completed survey is my informed consent to participate in the study.

If you would like a copy of the consent form, print a copy before continuing.

By clicking on "next" at the bottom of this page you are consenting to participate in this research survey.

If you do not wish to participate, click the "x" in the top corner of the browser to exit.

Thank you very much for your time.

Dr. Peter Reuter  
Associate Professor  
Department of Rehabilitation Sciences  
Marieb College of Health & Human Services

**How old are you?**

**Race/ethnicity**

Mark all that apply

- Caucasian
- African-American/black
- Hispanic
- Non-hispanic
- East Asian
- Other:

**How tall are you?**

In feet and inches

**How much do you weigh?**

In pounds

**What is your relationship status?**

- Single
- In a committed relationship
- In an open relationship
- Married

**What is your biological sex?**

- Male
- Female

**What is your gender identity?**

- Male
- Transgender male to female
- Transgender female to male
- Female

**What is your sexual orientation?**

- Heterosexual
- Homosexual (gay/lesbian)
- Bisexual
- Pansexual
- Asexual
- Other:

**Are you sexually active?**

- Yes
- No

**Are you an FGCU student?**

- Yes
- No

**Are you a ...**

- Freshman     Graduate student
- Sophomore     Second-degree seeking student
- Junior     Non-degree seeking student
- Senior

**Are you a full time student?**

Yes

No

**Which college do you belong to?**

Arts and Sciences

Education

Business

Health Professions and Human Services

Engineering

Other:

**Do you have an emotional support (assistance) or service animal?**

Yes

No

**What is your current overall GPA?**

**What is the highest educational level attained by your father?**

Please note that this question asks about the highest grade level completed, not the highest grade level attended. If a parent has attended college but not obtained a Bachelor's degree, the "High school" option should be marked.

Did not complete high school     Bachelor's degree

High school     Master's degree

Associate degree     Doctoral degree

**What is the highest educational level attained by your mother?**

Please note that this question asks about the highest grade level completed, not the highest grade level attended. If a parent has attended college but not obtained a Bachelor's degree, the "High school" option should be marked.

Did not complete high school     Bachelor's degree

High school     Master's degree

Associate degree     Doctoral degree

Did you get tested for Covid-19 since the beginning of the semester?

- Yes  
 No

Did you test positive?

- Yes  
 No

Did you have to quarantine because of your positive test?

- Yes  
 No

Did you have to quarantine at some stage during the semester?

- Yes  
 No

Did you have to quarantine more than once?

- Yes  
 No

What type of classes are you taking this semester? Please mark all that apply.

- Face-2-face (in-person) class  
 Online asynchronous (pre-recorded) class  
 Online synchronous (live lecture) class  
 Hybrid class with face-2-face class and online asynchronous class  
 Hybrid class with face-2-face class and online synchronous class

What is your overall assessment of the teaching this semester on a scale from 1-10?

|                       |                       |                       |                       |                       |                       |                       |                       |                       |                       |                       |
|-----------------------|-----------------------|-----------------------|-----------------------|-----------------------|-----------------------|-----------------------|-----------------------|-----------------------|-----------------------|-----------------------|
| terrible              |                       |                       |                       |                       | okay                  |                       |                       |                       |                       | awesome               |
| <input type="radio"/> | <input type="radio"/> | <input type="radio"/> | <input type="radio"/> | <input type="radio"/> | <input type="radio"/> | <input type="radio"/> | <input type="radio"/> | <input type="radio"/> | <input type="radio"/> | <input type="radio"/> |
| 1                     | 2                     | 3                     | 4                     | 5                     | 6                     | 7                     | 8                     | 9                     | 10                    |                       |

What is your assessment of how much your instructors care for your academic success this semester on a scale from 1 -10?

|                                 |                       |                       |                       |                       |                          |                       |                       |                       |                       |                                                |
|---------------------------------|-----------------------|-----------------------|-----------------------|-----------------------|--------------------------|-----------------------|-----------------------|-----------------------|-----------------------|------------------------------------------------|
| they<br>don't<br>care at<br>all |                       |                       |                       |                       | some care,<br>some don't |                       |                       |                       |                       | they<br>really<br>show<br>that<br>they<br>care |
| <input type="radio"/>           | <input type="radio"/> | <input type="radio"/> | <input type="radio"/> | <input type="radio"/> | <input type="radio"/>    | <input type="radio"/> | <input type="radio"/> | <input type="radio"/> | <input type="radio"/> | <input type="radio"/>                          |
| 1                               | 2                     | 3                     | 4                     | 5                     | 6                        | 7                     | 8                     | 9                     | 10                    |                                                |

What is your assessment of how much your instructors care for your mental/emotional well-being this semester on a scale from 1 - 10?

|                                 |                       |                       |                       |                       |                          |                       |                       |                       |                       |                                                |
|---------------------------------|-----------------------|-----------------------|-----------------------|-----------------------|--------------------------|-----------------------|-----------------------|-----------------------|-----------------------|------------------------------------------------|
| they<br>don't<br>care at<br>all |                       |                       |                       |                       | some care,<br>some don't |                       |                       |                       |                       | they<br>really<br>show<br>that<br>they<br>care |
| <input type="radio"/>           | <input type="radio"/> | <input type="radio"/> | <input type="radio"/> | <input type="radio"/> | <input type="radio"/>    | <input type="radio"/> | <input type="radio"/> | <input type="radio"/> | <input type="radio"/> | <input type="radio"/>                          |
| 1                               | 2                     | 3                     | 4                     | 5                     | 6                        | 7                     | 8                     | 9                     | 10                    |                                                |

Do you think your grades this semester will be different than they would have been without the changes to teaching caused by Covid-19?

- Yes, they will be lower  
 Yes, they will be better  
 No, they will be about the same

Do you feel safe on campus this semester?

- Yes  
 No

During the past 6 months have you felt yourself craving human interaction?

- Yes  
 No

Do you think the lack of social events this semester has affected your mental/emotional health?

- Yes
- No

Can you tell us more about how your mental/emotional health has been affected?

Has going to mostly virtual teaching affected your mental/emotional health?

- Yes
- No

Can you tell us more about how your mental/emotional health has been affected by this change?

In comparison to previous semesters, do you find yourself more or less connected to your peers?

- More
- About the same
- Less

How motivated do you feel in your classes this semester compared with previous semesters?

- More
- About the same
- Less

Please select up to ten words that describe your emotional state this semester.

- |                                       |                                      |                                      |
|---------------------------------------|--------------------------------------|--------------------------------------|
| <input type="checkbox"/> Alone        | <input type="checkbox"/> Frightened  | <input type="checkbox"/> Overwhelmed |
| <input type="checkbox"/> Angry        | <input type="checkbox"/> Gloomy      | <input type="checkbox"/> Peaceful    |
| <input type="checkbox"/> Anxious      | <input type="checkbox"/> Happy       | <input type="checkbox"/> Positive    |
| <input type="checkbox"/> Calm         | <input type="checkbox"/> Hopeful     | <input type="checkbox"/> Powerless   |
| <input type="checkbox"/> Confident    | <input type="checkbox"/> Hopeless    | <input type="checkbox"/> Relaxed     |
| <input type="checkbox"/> Demoralized  | <input type="checkbox"/> Indifferent | <input type="checkbox"/> Sad         |
| <input type="checkbox"/> Depressed    | <input type="checkbox"/> Inspired    | <input type="checkbox"/> Sanguine    |
| <input type="checkbox"/> Disconnected | <input type="checkbox"/> Lonely      | <input type="checkbox"/> Serene      |
| <input type="checkbox"/> Distressed   | <input type="checkbox"/> Miserable   | <input type="checkbox"/> Stressed    |
| <input type="checkbox"/> Empty        | <input type="checkbox"/> Moody       | <input type="checkbox"/> Tired       |
| <input type="checkbox"/> Energized    | <input type="checkbox"/> Negative    | <input type="checkbox"/> Unhappy     |
| <input type="checkbox"/> Engaged      | <input type="checkbox"/> Neutral     | <input type="checkbox"/> Upbeat      |
| <input type="checkbox"/> Fatigued     | <input type="checkbox"/> Optimistic  | <input type="checkbox"/> Withdrawn   |

**What are your living arrangements?**

- On campus
- At home with family
- Off campus with other students/roommates
- Off campus on your own

**Did your living arrangements change due to Covid-19?**

- Yes
- No

**What were you living arrangements before Covid-19?**

- On campus
- At home with family
- Off campus with other students/roommates
- Off campus on my own

**Are you a part of Greek Life at FGCU?**

- Yes
- No

**Are you a member of a registered FGCU student organization or club?**

- Yes
- No

**Are you religious?**

- Yes
- No

**During the past 7 days, how many hours of sleep did you get on average per night?**

- 4 hours or less
- 5 hours
- 6 hours
- 7 hours
- 8 hours
- 9 hours
- 10 or more hours

**During the past 7 days, on average what time did you go to bed each night?**

- Before 8pm
- Between 8pm and 10pm
- Between 10pm and 12am
- Between 12am and 2am
- After 2am

**Do you work?**

- Yes
- No

**On average, how many hours do you work per week?**

- Under 5 hours
- 5-10 hours
- 10-20 hours
- 20-30 hours
- 30-40 hours
- Over 40 hours

**On average, during the past 7 days, how many hours did you watch or read on a TV/Computer/Tablet (iBooks, Kindle, online newspaper or article, Netflix, Hulu, Amazon Prime Video, or another streaming source) per day?**

- Not at all
- Less than 1 hour per day
- 1 hour per day
- 2 hours per day
- 3 hours per day
- 4 hours per day
- 5 hours or more per day

**Do you check your phone at night after you are in bed?**

Yes

No

**During the past 7 days, how many hours did you play video or computer games or use a computer/tablet/smart phone for something that is not school work on average per day?**

Not at all  3 hours per day

Less than 1 hour per day  4 hours per day

1 hour per day  5 or more hours per day

2 hours per day

**How long before going to sleep do you turn off TV/technology?**

1 minute or less before  30 minutes before

5 minutes before  1 hour before

10 minutes before  More than 1 hour before

20 minutes before



**Do you have serious difficulty concentrating, remembering, or making decisions because of a physical, mental, or emotional problem?**

- Yes
- No

**Have you been diagnosed with/are you being treated for a mental health disorder?**

- Yes
- No

**Have you been diagnosed with/are you being treated for a learning disability?**

- Yes
- No

**Which disorder/disability are you being treated for?**

**During the past 12 months, have you ever been bullied on campus including the dorms?**

Bullying is when 1 or more students tease, threaten, spread rumors about, hit, shove, or hurt another student over and over again. It is not bullying when 2 students of about the same strength or power argue or fight or tease each other in a friendly way.

- Yes
- No

**During the past 12 months, have you ever been cyber bullied?**

Count being bullied through texting, Instagram, Facebook, or other social media.

- Yes
- No

**During the past 12 months, did you ever feel so sad or hopeless almost every day for two weeks or more in a row that you stopped doing some usual activities?**

- Yes
- No

The following question(s) ask about suicidal thoughts and suicide attempts. You are under no obligation to answer any of the questions but can skip over this part and continue the survey on the next page.

**During the past 12 months, did you ever seriously consider attempting suicide?**

- Yes
- No

**How many times did you consider attempting suicide?**

- 1 time
- 2 or 3 times
- 4 or 5 times
- 6 or more times

**Did you make a plan about how you would attempt suicide?**

- Yes
- No

**Did you actually attempt suicide?**

- Yes
- No

**How many times did you actually attempt suicide?**

- 0 times (not at all)
- 1 time
- 2 or 3 times
- 4 or 5 times
- 6 or more times

**Did the attempt/any of the attempts result in an injury, poisoning, or overdose that had to be treated by a doctor or nurse?**

- Yes

No

We understand that some participants may find it hard to answer certain questions or may get overwhelmed by emotions when describing events from the past.

If you are in immediate distress or crisis and need to speak to a clinician call the CAPS office and ask for an appointment or to speak with a clinician. Nights, weekends, and holidays, you may call the CAPS help line (239) 745-3277 and you will be connected to a clinician.

If you are in imminent danger to harm yourself or others, call 911 if you are off campus and 590-1911 if you are on campus, or you may go to the emergency room at the nearest hospital.

You may also contact the National Suicide Prevention Lifeline at 1-800-273-TALK (8255).

**How do you describe your weight?**

- Very underweight
- Slightly underweight
- About the right weight
- Slightly overweight
- Very overweight

**Which of the following are you trying to do about your weight?**

- I am not trying to do anything about my weight
- Lose weight
- Gain weight
- Stay the same weight

**During the past 7 days, on how many days were you physically active for a total of at least 60 minutes per day?**

- 0 days (not at all)     4 days
- 1 day                     5 days
- 2 days                     6 days
- 3 days                     7 days

**During the past 7 days, on how many days did you do exercises to strengthen or tone your muscles, such as push-ups, sit-ups, or weight lifting?**

- 0 days (not at all)     4 days
- 1 day                     5 days
- 2 days                     6 days
- 3 days                     7 days

**Do you have any dietary limitations/restrictions?**

- Yes
- No

**Which dietary limitations/restrictions do you have?**

Are you a

- Vegan
- Vegetarian
- Gluten-free
- Lactose intolerant
- Diabetic
- Other:

**During the past 7 days, how many times did you eat vegetables?**

- 0 times (not at all)
- 1 to 3 times
- 4 to 6 times
- 7 to 10 times
- 11 times or more

**During the past 7 days, how many times did you eat fresh fruit?**

- 0 times (not at all)
- 1 to 3 times
- 4 to 6 times
- 7 to 10 times
- 11 times or more

**Over the past 7 days, how many cups of caffeinated coffee have you consumed on average per day?**

Include hot and iced coffee; 1 cup = 8oz-10oz

- 0 (none at all)
- 1-2 cups

- 3-4 cups
- 5-6 cups
- more than 7 cups

**During the past 7 days, on how many days did you eat breakfast?**

- 0 days (not at all)  4 days
- 1 day  5 days
- 2 days  6 days
- 3 days  7 days (everyday)

**During the past 7 days, how many times did you eat fast food?**

- 0 times (not at all)
- 1 to 3 times
- 4 to 6 times
- 7 to 10 times
- 11 times or more

**On average, how many nights a week do you go out?**

- 0 (Not at all)  4 nights
- 1 night  5 nights
- 2 nights  6 nights
- 7 nights  7 nights (every night)

**During the past 7 days, how many packs of cigarettes did you smoke overall?**

- I don't smoke  4 packs
- less than 1 pack  5 packs
- 1 pack  6 packs
- 2 packs  7 packs
- 3 packs  Other:

**Have you ever used an electronic vapor product?**

Electronic vapor products include e-cigarettes, e-cigars, e-pipes, vape pipes, vaping pens, e-hookahs, and hookah pens.

- Yes
- No

**During the past 7 days, on how many days did you use an electronic vapor product?**

- 0 days (not at all)  4 days
- 1 day  5 days
- 2 days  6 days
- 3 days  7 days (everyday)

**During the past 30 days, on how many days did you have at least one drink of alcohol?**

- 0 days (not at all)  10 - 19 days
- 1 - 2 days  20 - 29 days
- 3 - 5 days  All 30 days (everyday)
- 6 - 9 days

**During the past 30 days, what is the largest number of alcoholic drinks you had in a row?**

- 0 drinks  5 drinks
- 1 or 2 drinks  6 or 7 drinks
- 3 drinks  8 or 9 drinks
- 4 drinks  10 or more drinks

**During the past 7 days, how many times did you use marijuana?**

- 0 times (not at all)  4 days
- 1 day  5 days
- 2 days  6 days
- 3 days  7 days (everyday)

**How many times have you taken prescription pain medicine without a doctor's prescription or differently than how a doctor told you to use it?**

Count drugs such as codeine, Vicodin, OxyContin, Hydrocodone, and Percocet.

- 0 times (not at all)     10 to 19 times
- 1 or 2 times         20 to 39 times
- 3 to 9 times          40 or more times

**When was the last time you used prescription pain killers?**

**Over the last 30 days, did you use drugs other than marijuana, such as cocaine, heroin, methamphetamines, ecstasy, hallucinogenic drugs, synthetic marijuana or sniffed glue, breathed the contents of aerosol spray cans or inhaled any paints or sprays to get high?**

- Yes
- No

**Which drug(s) did you use?**

**Thank you very much for the taking the time to complete this survey.**

Let us reassure you one more time that, because you submitted your answers anonymously, neither we nor anybody else who will look at individual surveys or the compiled results of all surveys will be able to identify you or any other participant in this study.

If you have any questions about this study, you may contact the Principal Investigator Dr. Peter Reuter at 239-590-7512 or via email at [preuter@fgcu.edu](mailto:preuter@fgcu.edu)

If you have any questions about your rights as a participant in this research, or if you feel you have been placed at risk, you can contact the Chair of the Human Subjects' Institutional Review Board, Office of Research and Sponsored Programs, at 239-590-7522.
